# Supplementary material for: Correlation Between Rostral Dorsomedial Prefrontal Cortex Activation by Trauma-Related Words and Subsequent Response to CBT for PTSD
Source: Atypon-hosted journal article supplement (doi:10.1176/appi.neuropsych.20030058), 2020-10-28
Supplement: appi.neuropsych.20030058.ds001.pdf [file appi.neuropsych.20030058.ds001.pdf]

## Supplementary Materials:

### Imaging Methods:

#### *fMRI Image Acquisition*

Images were acquired with a research-dedicated GE Signa 3 Tesla MRI scanner (max gradient strength 40mT/m; max slew rate 150T/m/s) (General Electric Company, Waukesha, Wisconsin) with an MRI-compatible head holder at the Weill Medical College of Cornell University.

Anatomical localization: Three to five T1 weighted sagittal slices were collected to localize the anterior and posterior commissures, followed by a set of 17 coronal slices perpendicular to the AC-PC line to determine the location of the amygdala and hippocampus. A reference T1 weighted anatomical image with the same axial slice placement and thickness as the functional imaging was then acquired with two slices centered within the amygdala, as the proxy for co-registration purpose (256x256 matrix size, 5mm in thickness, 1mm gap, TE/TR=14/500ms, FoV=240mm). Functional imaging: Blood Oxygenation Level-Dependent (BOLD) contrast imaging, which reflects changes in venous deoxyhemoglobin associated with neuronal activity, was employed. After shimming to maximize homogeneity, a series of functional scans was collected using a gradient echo EPI sequence (TR=1200ms, TE=30ms, 15 or 21 slices of 5mm in thickness, 1mm gap, FoV=240mm, matrix=64x64), with a z-shimming algorithm (Gu 2002) to reduce susceptibility-induced signal losses at the base of the brain. Structural imaging: A high-resolution T1 weighted anatomical image is acquired using a spoiled gradient (SPGR) recalled acquisition sequence (TR/TE=30/8msec, flip angle=45, field of view=220mm, 140 coronal slices with thickness=contiguous 1.5mm, number of averages=1, matrix=256x256, voxel resolution=0.8594x1.5x0.8594mm<sup>3</sup>). Functional MRI System: The Integrated Functional Imaging System SA/E-Prime environment (IFIS-SA, MRI Devices, Waukesha WI; Psychology Software Tools, Pittsburgh PA) were configured and programmed for visual stimulus delivery and response collection (via the head coil-mounted LCD display, headphones and Brainlogics Fiber Optic Button Response Units) that were synchronized via MRI scanner trigger signal in the MRI scanning protocol.

#### *fMRI Image Processing*

The functional image processing pipeline consisted of the following steps using customized SPM software (Friston 2007, Pan, Epstein et al. 2011) carried out on an UNIX server (Sun Microsystems, Mountainview, CA): Reconstruction of EPI functional images using modified GE reconstruction software with off-resonance phase correction, slice-timing correction and Hanning-window apodization; Extraction of physiological fluctuations such as cardiac and respiratory cycles from EPI image sequence (Frank, Buxton et al. 2001); Manual AC-PC re-orientation of the two anatomical images and application of the transformation parameters of the reference T1 image to all functional EPI-BOLD images; Realignment to further correct for slight head movement between scans and for differential spin excitation history based on intracranial voxels; Co-registration of functional EPI-BOLD images to the corresponding high-resolution T1 anatomical image, based on the rigid body transformation parameters of the reference T1 image to the latter for each individual subject; Stereotactic normalization to the standardized Montreal Neurologic Institute (MNI) coordinate space based on the high-resolution T1 anatomical image to normalize for individual differences in brain morphology (12 nonlinear

iterations,  $7 \times 8 \times 7$  nonlinear basis functions, medium regularization, and resampled to  $3 \times 3 \times 3$  mm<sup>3</sup> voxels using sinc interpolation), and application of the normalization transformation to all functional EPI-BOLD images; Spatial smoothing of all the normalized functional EPI-BOLD images with an isotropic Gaussian kernel (FWHM = 7.5mm). Extensive examination of processed images at each intermediate stage for quality assurance was performed both by visual inspection and quantitation. fMRI data sets in this study were quality controlled against and met with the stringent criteria that there can be no movement of greater than 1/3 voxel over the study session for each participant.

### *Functional Image Analysis*

Using customized *fmrstat* software (Worsley, Liao et al. 2002), a two-level voxel-wise linear fixed-effects model was utilized to examine the effect sizes of the key Group/Condition contrasts in an ANCOVA setting. First, a voxel-wise multiple linear regression model was employed at the individual subject level. This was comprised of the block-by-block regressors of interest, which consist of each stimulus block onset time/duration convolved with a prototypical hemodynamic response function, and the covariates of no interest, which consist of the temporal first-order derivative of the principal regressors (to compensate for slight latency differences in individual hemodynamic response from the prototypical response function), global fluctuations, physiological fluctuations, realignment parameters, and scanning periods (Aguirre, Zarahn et al. 1998, McGonigle, Howseman et al. 2000). Temporal filtering was performed to counter the effects of baseline shifts and higher frequency noise (than prototypical hemodynamic response), and a voxel-wise *AR(1)* model of the time course is used to accommodate temporal correlation in consecutive scans. Effects at every brain voxel were estimated using the EM (expectation maximization) algorithm, and task-specific condition effects of Word Type were then compared using linear contrasts. That is, for each subject, the effect image and its standard error image for each Word Type were calculated, and these were also combined in a series of linear contrasts between Word Types to be entered into the second group-level analysis to assess within-group effect sizes of the key hypotheses. Second, at the group level, the within-group effects of the hypothesis-driven contrasts (PTSD words vs Panic Disorder words, PTSD words vs. Neutral words, PTSD words vs. Positive words) were examined for the pre-treatment mean effects of the contrasts of interest, and their association with normalized CAPS improvement index via a multiple regression model, with the CAPS improvement index as the main regressor, and age and scanning protocol as covariates of no-interest. (Two different scanning protocols were used, with the only difference being number of slices collected. There were no effects of protocol detected in ANCOVA, so scans were combined, with protocol as a covariate of no interest.) These group-level correlation effect estimates generated statistical maps of the t-statistic, and the statistical significance of the t-maps was then evaluated in the final step of inference. The statistical inference is based on random field theory as implemented in *fmrstat*, where the t-statistical maps were thresholded initially at a voxel-wise two-tailed p-value < 0.01 and a cluster spatial extent > 250 mm<sup>3</sup>. The group-level correlation effect of interest at a peak coordinate was considered significant if the corrected p-value < 0.05, which was based on family-wise error rate correction of the voxel-wise p-values over the entire brain.

Supplementary Table S1. PT v NU

| PT > NU | Brain Region                             | Brodmann Area | MNI Coordinates |     |     | Z-value | p-value | Corrected p-value | Cluster ID | Cluster Size (mm <sup>3</sup> ) |
|---------|------------------------------------------|---------------|-----------------|-----|-----|---------|---------|-------------------|------------|---------------------------------|
|         |                                          |               | X               | Y   | Z   |         |         |                   |            |                                 |
|         | L Superior Frontal Gyrus                 | 8             | -3              | 51  | 45  | 8.126   | <0.001  | <0.001            | 1          | 64854                           |
|         | Medial Frontal Gyrus                     | 9             | 0               | 63  | 30  | 7.076   | <0.001  | <0.001            | 1          |                                 |
|         | R Medial Frontal Gyrus                   | 8             | 6               | 63  | 36  | 6.497   | <0.001  | <0.001            | 1          |                                 |
|         | R Superior Frontal Gyrus                 | 6             | 12              | 15  | 75  | 5.509   | <0.001  | <0.001            | 1          |                                 |
|         | L Superior Frontal Gyrus                 | 6             | -6              | 21  | 66  | 5.49    | <0.001  | <0.001            | 1          |                                 |
|         | L Medial Frontal Gyrus                   | 10            | -6              | 66  | 9   | 5.141   | <0.001  | 0.001             | 1          |                                 |
|         | Superior Frontal Gyrus                   | 9             | 0               | 60  | 21  | 5.123   | <0.001  | 0.001             | 1          |                                 |
|         | R Superior Frontal Gyrus                 | 8             | 12              | 54  | 48  | 4.896   | <0.001  | 0.002             | 1          |                                 |
|         | L Superior Frontal Gyrus                 | 6             | -12             | 27  | 57  | 4.639   | <0.001  | 0.006             | 1          |                                 |
|         | Superior Frontal Gyrus                   | 6             | 0               | 15  | 63  | 4.608   | <0.001  | 0.007             | 1          |                                 |
|         | L Red Nucleus                            |               | -3              | -21 | -15 | 6.724   | <0.001  | <0.001            | 2          | 26298                           |
|         | L Thalamus, Pulvinar                     |               | -6              | -30 | -3  | 5.376   | <0.001  | <0.001            | 2          |                                 |
|         | R Caudate Head                           |               | 9               | 9   | -3  | 5.198   | <0.001  | <0.001            | 2          |                                 |
|         | L Lateral Globus Pallidus                |               | -12             | 9   | -3  | 4.971   | <0.001  | 0.001             | 2          |                                 |
|         | L Caudate Head                           |               | -9              | 12  | -3  | 4.927   | <0.001  | 0.002             | 2          |                                 |
|         | R Medial Globus Pallidus                 |               | 15              | -6  | -6  | 4.821   | <0.001  | 0.003             | 2          |                                 |
|         | L Thalamus, Anterior Nucleus             |               | -6              | 0   | 9   | 4.477   | <0.001  | 0.012             | 2          |                                 |
|         | R Caudate Body                           |               | 6               | 6   | 3   | 4.433   | <0.001  | 0.014             | 2          |                                 |
|         | L Amygdala                               |               | -24             | -6  | -15 | 4.339   | <0.001  | 0.02              | 2          |                                 |
|         | R Thalamus                               |               | 6               | 0   | 6   | 4.333   | <0.001  | 0.02              | 2          |                                 |
|         | R Hypothalamus                           |               | 6               | 0   | -18 | 4.204   | <0.001  | 0.033             | 2          |                                 |
|         | R Cerebellum, Inferior Semi-Lunar Lobule |               | 39              | -78 | -42 | 5.649   | <0.001  | <0.001            | 3          | 19521                           |
|         | R Fusiform Gyrus                         | 18            | 24              | -99 | -12 | 4.979   | <0.001  | 0.001             | 3          |                                 |
|         | R Inferior Occipital Gyrus               | 18            | 36              | -90 | -9  | 4.842   | <0.001  | 0.002             | 3          |                                 |
|         | R Cerebellum, Pyramis                    |               | 12              | -84 | -24 | 4.777   | <0.001  | 0.003             | 3          |                                 |
|         | R Cerebellum, Uvula                      |               | 9               | -93 | -39 | 4.717   | <0.001  | 0.004             | 3          |                                 |

|   |                                        |    |     |     |     |       |        |        |    |       |
|---|----------------------------------------|----|-----|-----|-----|-------|--------|--------|----|-------|
| R | Fusiform Gyrus                         | 18 | 27  | -93 | -9  | 4.651 | <0.001 | 0.006  | 3  |       |
| R | Cerebellum, Tuber                      |    | 51  | -66 | -33 | 4.444 | <0.001 | 0.013  | 3  |       |
| L | Inferior Frontal Gyrus                 | 47 | -48 | 30  | -9  | 6.106 | <0.001 | <0.001 | 4  | 14256 |
| L | Inferior Frontal Gyrus                 | 9  | -54 | 24  | 18  | 5.089 | <0.001 | 0.001  | 4  |       |
| L | Precentral Gyrus                       | 44 | -51 | 21  | 3   | 4.434 | <0.001 | 0.014  | 4  |       |
| L | Inferior Frontal Gyrus                 | 46 | -48 | 42  | 0   | 4.148 | <0.001 | 0.041  | 4  |       |
| L | Precuneus                              | 19 | -48 | -72 | 51  | 6.577 | <0.001 | <0.001 | 5  | 14472 |
| L | Inferior Parietal Lobule               | 39 | -51 | -69 | 51  | 6.281 | <0.001 | <0.001 | 5  |       |
| L | Angular Gyrus                          | 39 | -54 | -66 | 48  | 5.95  | <0.001 | <0.001 | 5  |       |
| L | Middle Temporal Gyrus                  | 39 | -51 | -63 | 27  | 5.535 | <0.001 | <0.001 | 5  |       |
| L | Inferior Parietal Lobule               | 39 | -54 | -63 | 51  | 5.425 | <0.001 | <0.001 | 5  |       |
| L | Middle Temporal Gyrus                  | 39 | -48 | -60 | 27  | 5.395 | <0.001 | <0.001 | 5  |       |
| L | Superior Temporal Gyrus                | 39 | -51 | -60 | 24  | 5.388 | <0.001 | <0.001 | 5  |       |
| L | Superior Temporal Gyrus                | 22 | -54 | -57 | 24  | 5.32  | <0.001 | <0.001 | 5  |       |
| L | Supramarginal Gyrus                    | 40 | -57 | -54 | 24  | 5.17  | <0.001 | 0.001  | 5  |       |
| R | Superior Temporal Gyrus                | 22 | 57  | -9  | -15 | 5.668 | <0.001 | <0.001 | 6  | 7965  |
| R | Superior Temporal Gyrus                | 38 | 48  | 9   | -30 | 5.348 | <0.001 | <0.001 | 6  |       |
| R | Middle Temporal Gyrus                  | 21 | 54  | 0   | -27 | 4.679 | <0.001 | 0.005  | 6  |       |
| L | Middle Temporal Gyrus                  | 21 | -57 | -6  | -24 | 5.011 | <0.001 | 0.001  | 7  | 5805  |
| R | Inferior Frontal Gyrus                 | 45 | 69  | 30  | 15  | 5.311 | <0.001 | <0.001 | 8  | 6210  |
| R | Inferior Frontal Gyrus                 | 44 | 51  | 21  | 6   | 4.871 | <0.001 | 0.002  | 8  |       |
| L | Middle Frontal Gyrus                   | 8  | -51 | 24  | 45  | 4.992 | <0.001 | 0.001  | 9  | 5886  |
| L | Middle Frontal Gyrus                   | 6  | -51 | 15  | 54  | 4.944 | <0.001 | 0.002  | 9  |       |
| L | Precuneus                              | 7  | -3  | -63 | 36  | 5.173 | <0.001 | 0.001  | 10 | 7911  |
| L | Cuneus                                 | 7  | -3  | -72 | 39  | 5.15  | <0.001 | 0.001  | 10 |       |
|   | Cingulate Gyrus                        | 31 | 0   | -54 | 33  | 4.82  | <0.001 | 0.003  | 10 |       |
| R | Insula                                 | 13 | 36  | 27  | -12 | 5.379 | <0.001 | <0.001 | 11 | 2862  |
| R | Inferior Frontal Gyrus                 | 47 | 39  | 30  | -12 | 5.331 | <0.001 | <0.001 | 11 |       |
| L | Cerebellum, Inferior Semi-Lunar Lobule |    | -27 | -87 | -39 | 6.186 | <0.001 | <0.001 | 12 | 3726  |
| L | Cerebellum, Declive                    |    | -18 | -90 | -21 | 4.254 | <0.001 | 0.028  | 14 | 1485  |
| R | Precentral Gyrus                       | 6  | 72  | 9   | 39  | 4.786 | <0.001 | 0.003  | 15 | 675   |

| NU > PT | Brain Region               | Brodmann Area | MNI Coordinates |     |    | Z-value | p-value | Corrected p-value | Cluster ID | Cluster Size (mm <sup>3</sup> ) |
|---------|----------------------------|---------------|-----------------|-----|----|---------|---------|-------------------|------------|---------------------------------|
|         |                            |               | X               | Y   | Z  |         |         |                   |            |                                 |
| 1       | L Precentral Gyrus         | 6             | -60             | 0   | 30 | 7.413   | <0.001  | <0.001            | 1          | 207252                          |
|         | L Insula                   | 13            | -42             | -21 | 21 | 7.353   | <0.001  | <0.001            | 1          |                                 |
|         | R Precentral Gyrus         | 6             | 57              | 0   | 3  | 6.396   | <0.001  | <0.001            | 1          |                                 |
|         | L Precentral Gyrus         | 4             | -60             | -9  | 30 | 6.315   | <0.001  | <0.001            | 1          |                                 |
|         | L Precentral Gyrus         | 3             | -57             | -12 | 27 | 6.203   | <0.001  | <0.001            | 1          |                                 |
|         | L Supramarginal Gyrus      | 40            | -42             | -42 | 39 | 5.741   | <0.001  | <0.001            | 1          |                                 |
|         | R Insula                   | 13            | 45              | -18 | 21 | 5.705   | <0.001  | <0.001            | 1          |                                 |
|         | L Postcentral Gyrus        | 43            | -66             | -9  | 18 | 5.645   | <0.001  | <0.001            | 1          |                                 |
|         | R Precuneus                | 7             | 15              | -57 | 69 | 5.64    | <0.001  | <0.001            | 1          |                                 |
|         | R Postcentral Gyrus        | 2             | 39              | -30 | 66 | 5.63    | <0.001  | <0.001            | 1          |                                 |
|         | L Postcentral Gyrus        | 3             | -48             | -15 | 36 | 5.59    | <0.001  | <0.001            | 1          |                                 |
|         | R Superior Parietal Lobule | 7             | 27              | -60 | 69 | 5.584   | <0.001  | <0.001            | 1          |                                 |
|         | R Inferior Parietal Lobule | 40            | 45              | -36 | 51 | 5.582   | <0.001  | <0.001            | 1          |                                 |
|         | L Superior Temporal Gyrus  | 41            | -51             | -33 | 15 | 5.576   | <0.001  | <0.001            | 1          |                                 |
|         | L Sub-Gyral                | 40            | -36             | -45 | 39 | 5.562   | <0.001  | <0.001            | 1          |                                 |
|         | L Middle Temporal Gyrus    |               | -51             | -66 | 3  | 5.506   | <0.001  | <0.001            | 1          |                                 |
|         | L Postcentral Gyrus        | 1             | -57             | -12 | 48 | 5.467   | <0.001  | <0.001            | 1          |                                 |
|         | L Postcentral Gyrus        | 2             | -60             | -15 | 48 | 5.414   | <0.001  | <0.001            | 1          |                                 |
|         | L Superior Parietal Lobule | 7             | -30             | -51 | 69 | 5.398   | <0.001  | <0.001            | 1          |                                 |
|         | L Superior Temporal Gyrus  |               | -54             | -3  | -3 | 5.255   | <0.001  | <0.001            | 1          |                                 |
|         | L Postcentral Gyrus        | 40            | -42             | -30 | 60 | 5.136   | <0.001  | 0.001             | 1          |                                 |
|         | R Paracentral Lobule       | 6             | 3               | -24 | 69 | 5.095   | <0.001  | 0.001             | 1          |                                 |
|         | L Middle Temporal Gyrus    | 37            | -45             | -69 | 12 | 5.073   | <0.001  | 0.001             | 1          |                                 |
|         | R Medial Frontal Gyrus     | 6             | 3               | -21 | 66 | 5.059   | <0.001  | 0.001             | 1          |                                 |
|         | L Posterior Cingulate      | 30            | -24             | -69 | 18 | 5.051   | <0.001  | 0.001             | 1          |                                 |
|         | L Fusiform Gyrus           | 37            | -42             | -54 | -6 | 5.011   | <0.001  | 0.001             | 1          |                                 |

|   |                          |    |     |     |     |       |        |        |    |       |
|---|--------------------------|----|-----|-----|-----|-------|--------|--------|----|-------|
| R | Postcentral Gyrus        | 7  | 12  | -48 | 69  | 4.992 | <0.001 | 0.001  | 1  |       |
| R | Precentral Gyrus         | 4  | 36  | -21 | 63  | 4.957 | <0.001 | 0.001  | 1  |       |
| L | Inferior Parietal Lobule | 40 | -48 | -39 | 51  | 4.95  | <0.001 | 0.002  | 1  |       |
|   | Medial Frontal Gyrus     | 6  | 0   | -15 | 57  | 4.839 | <0.001 | 0.003  | 1  |       |
| R | Postcentral Gyrus        | 3  | 30  | -27 | 69  | 4.825 | <0.001 | 0.003  | 1  |       |
| L | Superior Temporal Gyrus  | 42 | -63 | -30 | 15  | 4.751 | <0.001 | 0.004  | 1  |       |
| R | Paracentral Lobule       | 5  | 3   | -27 | 60  | 4.716 | <0.001 | 0.004  | 1  |       |
|   | Paracentral Lobule       | 5  | 0   | -30 | 60  | 4.712 | <0.001 | 0.004  | 1  |       |
| R | Inferior Frontal Gyrus   | 9  | 54  | 3   | 21  | 4.699 | <0.001 | 0.005  | 1  |       |
| R | Postcentral Gyrus        | 43 | 57  | -9  | 18  | 4.686 | <0.001 | 0.005  | 1  |       |
| R | Postcentral Gyrus        | 40 | 63  | -18 | 15  | 4.686 | <0.001 | 0.005  | 1  |       |
| L | Precuneus                | 7  | -21 | -69 | 48  | 4.54  | <0.001 | 0.009  | 1  |       |
| R | Sub-Gyral                | 40 | 39  | -42 | 36  | 4.498 | <0.001 | 0.011  | 1  |       |
| R | Postcentral Gyrus        |    | 60  | -12 | 12  | 4.385 | <0.001 | 0.017  | 1  |       |
| R | Clastrum                 |    | 42  | -3  | 3   | 4.259 | <0.001 | 0.027  | 1  |       |
| L | Clastrum                 |    | -39 | -21 | 0   | 4.202 | <0.001 | 0.033  | 1  |       |
| L | Cerebellum, Declive      |    | -24 | -57 | -12 | 4.189 | <0.001 | 0.035  | 1  |       |
| L | Precuneus                | 31 | -24 | -72 | 30  | 4.185 | <0.001 | 0.036  | 1  |       |
| L | Parahippocampal Gyrus    | 30 | -27 | -57 | 12  | 4.133 | <0.001 | 0.043  | 1  |       |
| R | Middle Temporal Gyrus    | 37 | 45  | -57 | 3   | 5.422 | <0.001 | <0.001 | 2  | 10908 |
| R | Parahippocampal Gyrus    | 19 | 42  | -48 | -9  | 4.714 | <0.001 | 0.004  | 2  |       |
| L | Cerebellar Tonsil        |    | -27 | -48 | -48 | 5.036 | <0.001 | 0.001  | 3  | 1944  |
| R | Cerebellar Tonsil        |    | 42  | -51 | -42 | 4.62  | <0.001 | 0.006  | 4  | 729   |
| R | Middle Frontal Gyrus     | 9  | 33  | 39  | 33  | 4.161 | <0.001 | 0.039  | 5  | 1809  |
| R | Posterior Cingulate      | 31 | 30  | -60 | 18  | 4.468 | <0.001 | 0.012  | 11 | 648   |
| L | Inferior Temporal Gyrus  | 20 | -63 | -42 | -24 | 4.136 | <0.001 | 0.043  | 12 | 324   |

Supplementary Table S1. Gray matter regions in which activation differs between PT and NU conditions ( $p < 0.05$  corrected for whole brain volume, cluster extent threshold  $> 250 \text{ mm}^3$ ).

Supplementary Table S2. PT v PA

| PT > PA | Brain Region                 | Brodmann Area | MNI Coordinates |     |     | Z-value | p-value | Corrected p-value | Cluster ID | Cluster Size (mm <sup>3</sup> ) |      |
|---------|------------------------------|---------------|-----------------|-----|-----|---------|---------|-------------------|------------|---------------------------------|------|
|         |                              |               | X               | Y   | Z   |         |         |                   |            |                                 |      |
|         | R Superior Frontal Gyrus     | 8             | 6               | 48  | 45  | 4.822   | <0.001  | 0.003             | 1          | 12258                           |      |
|         | L Superior Frontal Gyrus     | 6             | -6              | 45  | 51  | 4.68    | <0.001  | 0.005             | 1          |                                 |      |
|         | L Superior Frontal Gyrus     | 8             | -3              | 48  | 45  | 4.618   | <0.001  | 0.006             | 1          |                                 |      |
|         | R Medial Frontal Gyrus       | 8             | 6               | 45  | 39  | 4.554   | <0.001  | 0.008             | 1          |                                 |      |
|         | L Cerebellum, Declive        |               | -12             | -78 | -21 | 4.218   | <0.001  | 0.031             | 2          |                                 | 1485 |
|         | L Inferior Semi-Lunar Lobule |               | -27             | -87 | -42 | 4.38    | <0.001  | 0.017             | 3          |                                 | 2160 |
|         | R Inferior Frontal Gyrus     | 45            | 69              | 33  | 12  | 4.181   | <0.001  | 0.036             | 4          |                                 | 2673 |
|         | L Middle Temporal Gyrus      | 38            | -45             | 3   | -48 | 4.384   | <0.001  | 0.017             | 5          |                                 | 864  |
|         | R Superior Frontal Gyrus     | 10            | 27              | 75  | -15 | 4.407   | <0.001  | 0.015             | 6          |                                 | 702  |
|         | L Red Nucleus                |               | -3              | -18 | -15 | 4.462   | <0.001  | 0.012             | 7          |                                 | 756  |
|         | L Mammillary Body            |               | -3              | -15 | -12 | 4.371   | <0.001  | 0.018             | 7          |                                 |      |
|         | L Substantia Nigra           |               | -6              | -18 | -12 | 4.26    | <0.001  | 0.027             | 7          |                                 |      |
|         | R Superior Frontal Gyrus     | 6             | 15              | 15  | 66  | 4.507   | <0.001  | 0.01              | 8          |                                 | 864  |
|         | R Inferior Temporal Gyrus    | 20            | 51              | -15 | -42 | 4.211   | <0.001  | 0.032             | 9          |                                 | 594  |
|         | L Angular Gyrus              | 39            | -51             | -75 | 48  | 4.222   | <0.001  | 0.031             | 22         |                                 | 837  |
| PA > PT | Brain Region                 | Brodmann Area | MNI Coordinates |     |     | Z-value | p-value | Corrected p-value | Cluster ID | Cluster Size (mm <sup>3</sup> ) |      |
|         | L Postcentral Gyrus          | 3             | -33             | -27 | 66  | 4.764   | <0.001  | 0.003             | 1          | 10368                           |      |
|         | L Postcentral Gyrus          | 5             | -33             | -39 | 69  | 4.671   | <0.001  | 0.005             | 1          |                                 |      |
|         | L Postcentral Gyrus          | 7             | -12             | -48 | 72  | 4.524   | <0.001  | 0.01              | 1          |                                 |      |
|         | L Superior Parietal Lobule   | 7             | -27             | -57 | 72  | 4.402   | <0.001  | 0.016             | 1          |                                 |      |
|         | L Postcentral Gyrus          | 2             | -54             | -15 | 27  | 4.772   | <0.001  | 0.003             | 2          |                                 | 8208 |

|   |                         |    |     |     |     |       |        |       |    |      |
|---|-------------------------|----|-----|-----|-----|-------|--------|-------|----|------|
| L | Precentral Gyrus        | 3  | -57 | -12 | 30  | 4.53  | <0.001 | 0.009 | 2  |      |
| L | Insula                  | 13 | -42 | -21 | 21  | 4.515 | <0.001 | 0.01  | 2  |      |
| L | Precentral Gyrus        | 6  | -39 | -9  | 36  | 4.286 | <0.001 | 0.024 | 2  |      |
| R | Insula                  | 13 | 48  | -15 | 21  | 5.046 | <0.001 | 0.001 | 3  | 6966 |
| R | Postcentral Gyrus       | 43 | 57  | -9  | 18  | 4.578 | <0.001 | 0.008 | 3  |      |
| R | Postcentral Gyrus       |    | 60  | -12 | 15  | 4.548 | <0.001 | 0.009 | 3  |      |
| R | Postcentral Gyrus       | 40 | 63  | -18 | 15  | 4.528 | <0.001 | 0.009 | 3  |      |
| R | Precentral Gyrus        | 6  | 72  | 3   | 3   | 4.56  | <0.001 | 0.008 | 6  |      |
| R | Superior Temporal Gyrus | 22 | 75  | 3   | 6   | 4.332 | <0.001 | 0.02  | 6  | 3078 |
| L | Inferior Temporal Gyrus | 20 | -63 | -39 | -24 | 4.539 | <0.001 | 0.009 | 10 | 675  |
|   | Anterior Cingulate      | 32 | 0   | 24  | -21 | 4.247 | <0.001 | 0.028 | 15 | 378  |

Supplementary Table S2. Gray matter regions in which activation differs between PT and PA conditions ( $p < 0.05$  corrected for whole brain volume, cluster extent threshold  $> 250 \text{ mm}^3$ ).

Supplementary Table S3. PT v PO

| PT > PO | Brain Region             | Brodmann Area | MNI Coordinates |    |    | Z-value | p-value | Corrected p-value | Cluster ID | Cluster Size ( $\text{mm}^3$ ) |
|---------|--------------------------|---------------|-----------------|----|----|---------|---------|-------------------|------------|--------------------------------|
|         |                          |               | X               | Y  | Z  |         |         |                   |            |                                |
|         | L Superior Frontal Gyrus | 8             | -15             | 57 | 42 | 5.661   | <0.001  | <0.001            | 1          | 34803                          |
|         | L Superior Frontal Gyrus | 6             | -9              | 21 | 72 | 5.259   | <0.001  | <0.001            | 1          |                                |
|         | R Superior Frontal Gyrus | 8             | 15              | 54 | 51 | 4.856   | <0.001  | 0.002             | 1          |                                |
|         | L Medial Frontal Gyrus   | 9             | -9              | 54 | 27 | 4.764   | <0.001  | 0.003             | 1          |                                |
|         | L Medial Frontal Gyrus   | 6             | -3              | 39 | 30 | 4.743   | <0.001  | 0.004             | 1          |                                |
|         | R Superior Frontal Gyrus | 6             | 12              | 15 | 69 | 4.711   | <0.001  | 0.004             | 1          |                                |
|         | L Medial Frontal Gyrus   | 8             | -3              | 36 | 45 | 4.603   | <0.001  | 0.007             | 1          |                                |
|         | R Medial Frontal Gyrus   | 8             | 6               | 63 | 39 | 4.578   | <0.001  | 0.008             | 1          |                                |
|         | L Medial Frontal Gyrus   | 6             | -3              | 57 | 30 | 4.409   | <0.001  | 0.015             | 1          |                                |



|   |                                        |    |     |     |     |       |        |        |    |       |
|---|----------------------------------------|----|-----|-----|-----|-------|--------|--------|----|-------|
|   | Medial Frontal Gyrus                   | 9  | 0   | 60  | 30  | 4.396 | <0.001 | 0.016  | 1  |       |
| R | Cerebellum                             |    | 3   | -90 | -33 | 5.699 | <0.001 | <0.001 | 2  | 10773 |
| L | Cerebellum, Pyramis                    |    | -24 | -84 | -33 | 4.897 | <0.001 | 0.002  | 2  |       |
| L | Cerebellum, Uvula                      |    | -18 | -93 | -24 | 4.716 | <0.001 | 0.004  | 2  |       |
| L | Thalamus, Anterior Nucleus             |    | -3  | 3   | 6   | 4.782 | <0.001 | 0.003  | 3  | 11556 |
| L | Thalamus, Medial Dorsal Nucleus        |    | -3  | -9  | 0   | 4.713 | <0.001 | 0.004  | 3  |       |
|   | Caudate Body                           |    | 0   | 6   | 6   | 4.701 | <0.001 | 0.005  | 3  |       |
| R | Medial Globus Pallidus                 |    | 15  | -6  | -6  | 4.616 | <0.001 | 0.007  | 3  |       |
| L | Thalamus, Pulvinar                     |    | -6  | -30 | -3  | 4.569 | <0.001 | 0.008  | 3  |       |
|   | Thalamus                               |    | 0   | -12 | -6  | 4.389 | <0.001 | 0.016  | 3  |       |
| L | Parahippocampal Gyrus                  |    | -18 | -39 | 0   | 4.21  | <0.001 | 0.032  | 3  |       |
| R | Caudate Head                           |    | 6   | 12  | -3  | 4.155 | <0.001 | 0.04   | 3  |       |
| R | Cerebellum, Inferior Semi-Lunar Lobule |    | 36  | -78 | -51 | 5.017 | <0.001 | 0.001  | 4  | 6885  |
| R | Cerebellum, Tuber                      |    | 51  | -66 | -33 | 4.646 | <0.001 | 0.006  | 4  |       |
| R | Cerebellar Tonsil                      |    | 54  | -66 | -36 | 4.519 | <0.001 | 0.01   | 4  |       |
| R | Cerebellum, Pyramis                    |    | 42  | -81 | -33 | 4.38  | <0.001 | 0.017  | 4  |       |
| R | Insula                                 | 13 | 36  | 27  | -9  | 5.693 | <0.001 | <0.001 | 5  | 5562  |
| L | Superior Occipital Gyrus               | 19 | -42 | -81 | 42  | 5.524 | <0.001 | <0.001 | 6  | 11853 |
| L | Superior Parietal Lobule               | 7  | -39 | -75 | 57  | 4.766 | <0.001 | 0.003  | 6  |       |
| L | Middle Temporal Gyrus                  | 39 | -51 | -63 | 27  | 4.675 | <0.001 | 0.005  | 6  |       |
| L | Angular Gyrus                          | 39 | -57 | -69 | 42  | 4.457 | <0.001 | 0.013  | 6  |       |
| L | Inferior Parietal Lobule               | 7  | -45 | -69 | 60  | 4.296 | <0.001 | 0.023  | 6  |       |
| L | Middle Frontal Gyrus                   | 8  | -54 | 24  | 48  | 6.304 | <0.001 | <0.001 | 7  | 6534  |
| L | Middle Frontal Gyrus                   | 6  | -51 | 18  | 54  | 5.334 | <0.001 | <0.001 | 7  |       |
| R | Middle Temporal Gyrus                  | 21 | 54  | -6  | -21 | 5.196 | <0.001 | <0.001 | 8  | 2997  |
| R | Superior Temporal Gyrus                | 38 | 48  | 9   | -30 | 4.718 | <0.001 | 0.004  | 8  |       |
| R | Inferior Frontal Gyrus                 | 45 | 66  | 27  | 15  | 4.684 | <0.001 | 0.005  | 9  | 3591  |
| R | Middle Frontal Gyrus                   | 46 | 45  | 27  | 18  | 4.449 | <0.001 | 0.013  | 9  |       |
| L | Inferior Frontal Gyrus                 | 47 | -36 | 27  | -9  | 5.772 | <0.001 | <0.001 | 10 | 3375  |
| R | Red Nucleus                            |    | 3   | -24 | -18 | 4.807 | <0.001 | 0.003  | 11 | 1890  |
| L | Red Nucleus                            |    | -3  | -24 | -18 | 4.677 | <0.001 | 0.005  | 11 |       |

|                   |                            |                      |                        |          |          |                |                |                  |           |                              |                |
|-------------------|----------------------------|----------------------|------------------------|----------|----------|----------------|----------------|------------------|-----------|------------------------------|----------------|
|                   | L Medial Frontal Gyrus     | 11                   | -6                     | 54       | -21      | 4.871          | <0.001         | 0.002            | 12        | 891                          |                |
|                   | R Inferior Occipital Gyrus | 18                   | 36                     | -90      | -6       | 4.722          | <0.001         | 0.004            | 13        | 1053                         |                |
|                   | R Cerebellum, Nodule       |                      | 3                      | -57      | -33      | 4.608          | <0.001         | 0.007            | 14        | 972                          |                |
|                   | R Superior Temporal Gyrus  | 39                   | 69                     | -60      | 27       | 4.639          | <0.001         | 0.006            | 15        | 1188                         |                |
|                   | L Superior Temporal Gyrus  | 21                   | -60                    | -12      | -6       | 4.652          | <0.001         | 0.006            | 17        | 945                          |                |
|                   | L Superior Temporal Gyrus  | 22                   | -51                    | -18      | -12      | 4.171          | <0.001         | 0.037            | 17        |                              |                |
|                   | L Middle Temporal Gyrus    | 22                   | -57                    | -36      | 0        | 4.368          | <0.001         | 0.018            | 18        | 1053                         |                |
|                   | L Middle Temporal Gyrus    |                      | -54                    | -36      | -3       | 4.2            | <0.001         | 0.034            | 18        |                              |                |
| <b>PO &gt; PT</b> |                            |                      | <b>MNI Coordinates</b> |          |          |                |                | <b>Corrected</b> |           | <b>Cluster</b>               | <b>Cluster</b> |
|                   | <b>Brain Region</b>        | <b>Brodmann Area</b> | <b>X</b>               | <b>Y</b> | <b>Z</b> | <b>Z-value</b> | <b>p-value</b> | <b>p-value</b>   | <b>ID</b> | <b>Size (mm<sup>3</sup>)</b> |                |
|                   | L Supramarginal Gyrus      | 40                   | -42                    | -36      | 39       | 6.366          | <0.001         | <0.001           | 1         | 129114                       |                |
|                   | L Superior Parietal Lobule | 7                    | -21                    | -57      | 66       | 6.166          | <0.001         | <0.001           | 1         |                              |                |
|                   | L Postcentral Gyrus        | 3                    | -36                    | -27      | 63       | 5.992          | <0.001         | <0.001           | 1         |                              |                |
|                   | R Superior Parietal Lobule | 7                    | 27                     | -57      | 69       | 5.945          | <0.001         | <0.001           | 1         |                              |                |
|                   | R Postcentral Gyrus        | 5                    | 42                     | -36      | 66       | 5.818          | <0.001         | <0.001           | 1         |                              |                |
|                   | R Paracentral Lobule       | 6                    | 3                      | -24      | 69       | 5.601          | <0.001         | <0.001           | 1         |                              |                |
|                   | L Inferior Parietal Lobule | 40                   | -54                    | -30      | 33       | 5.512          | <0.001         | <0.001           | 1         |                              |                |
|                   | R Precentral Gyrus         | 4                    | 30                     | -15      | 63       | 5.393          | <0.001         | <0.001           | 1         |                              |                |
|                   | L Precentral Gyrus         | 6                    | -27                    | -9       | 66       | 5.358          | <0.001         | <0.001           | 1         |                              |                |
|                   | R Postcentral Gyrus        | 43                   | 57                     | -12      | 18       | 5.248          | <0.001         | <0.001           | 1         |                              |                |
|                   | R Precentral Gyrus         | 6                    | 33                     | -12      | 60       | 5.234          | <0.001         | <0.001           | 1         |                              |                |
|                   | L Postcentral Gyrus        | 5                    | -36                    | -42      | 69       | 5.227          | <0.001         | <0.001           | 1         |                              |                |
|                   | L Sub-Gyral                | 40                   | -36                    | -45      | 39       | 5.174          | <0.001         | 0.001            | 1         |                              |                |
|                   | R Insula                   | 13                   | 51                     | -15      | 21       | 5.149          | <0.001         | 0.001            | 1         |                              |                |
|                   | R Inferior Parietal Lobule | 40                   | 45                     | -36      | 54       | 5.146          | <0.001         | 0.001            | 1         |                              |                |
|                   | R Postcentral Gyrus        | 4                    | 48                     | -12      | 48       | 5.133          | <0.001         | 0.001            | 1         |                              |                |
|                   | L Precentral Gyrus         | 4                    | -42                    | -9       | 39       | 4.958          | <0.001         | 0.001            | 1         |                              |                |
|                   | R Postcentral Gyrus        | 3                    | 30                     | -24      | 69       | 4.933          | <0.001         | 0.002            | 1         |                              |                |

|   |                           |    |     |     |     |       |        |        |    |      |
|---|---------------------------|----|-----|-----|-----|-------|--------|--------|----|------|
| L | Precuneus                 | 7  | -6  | -45 | 66  | 4.894 | <0.001 | 0.002  | 1  |      |
| L | Postcentral Gyrus         | 40 | -66 | -18 | 18  | 4.779 | <0.001 | 0.003  | 1  |      |
|   | Medial Frontal Gyrus      | 6  | 0   | -18 | 57  | 4.771 | <0.001 | 0.003  | 1  |      |
|   | Paracentral Lobule        | 6  | 0   | -24 | 60  | 4.763 | <0.001 | 0.003  | 1  |      |
| L | Medial Frontal Gyrus      | 6  | -6  | -3  | 51  | 4.73  | <0.001 | 0.004  | 1  |      |
| L | Insula                    | 13 | -42 | -21 | 21  | 4.68  | <0.001 | 0.005  | 1  |      |
| L | Postcentral Gyrus         | 2  | -48 | -30 | 69  | 4.548 | <0.001 | 0.009  | 1  |      |
| L | Postcentral Gyrus         | 43 | -69 | -15 | 21  | 4.471 | <0.001 | 0.012  | 1  |      |
| R | Inferior Frontal Gyrus    | 9  | 48  | 3   | 21  | 4.443 | <0.001 | 0.013  | 1  |      |
| L | Transverse Temporal Gyrus | 42 | -63 | -12 | 15  | 4.329 | <0.001 | 0.021  | 1  |      |
| L | Cingulate Gyrus           | 24 | -15 | 9   | 45  | 4.238 | <0.001 | 0.029  | 1  |      |
| R | Precuneus                 | 7  | 9   | -45 | 66  | 4.196 | <0.001 | 0.034  | 1  |      |
| R | Cingulate Gyrus           | 31 | 27  | -45 | 33  | 4.174 | <0.001 | 0.037  | 1  |      |
| R | Middle Temporal Gyrus     | 37 | 48  | -60 | 6   | 4.239 | <0.001 | 0.029  | 2  | 5157 |
| R | Lingual Gyrus             | 19 | 36  | -60 | -3  | 4.147 | <0.001 | 0.041  | 2  |      |
| R | Precentral Gyrus          | 44 | 54  | 0   | 3   | 6.255 | <0.001 | <0.001 | 3  | 5724 |
| R | Precentral Gyrus          | 6  | 75  | 0   | 9   | 4.57  | <0.001 | 0.008  | 3  |      |
| R | Cerebellar Tonsil         | *  | 45  | -51 | -45 | 5.176 | <0.001 | 0.001  | 4  | 1782 |
| L | Superior Temporal Gyrus   | 22 | -51 | -3  | 0   | 5.325 | <0.001 | <0.001 | 6  | 2322 |
| L | Posterior Cingulate       | 30 | -24 | -69 | 18  | 4.528 | <0.001 | 0.009  | 8  | 675  |
| L | Subcallosal Gyrus         | 11 | -12 | 27  | -21 | 4.238 | <0.001 | 0.029  | 15 | 297  |
| R | Middle Frontal Gyrus      | 10 | 48  | 72  | 6   | 4.269 | <0.001 | 0.026  | 17 | 324  |
| L | Inferior Temporal Gyrus   | 20 | -69 | -39 | -21 | 4.722 | <0.001 | 0.004  | 27 | 297  |

Supplementary Table S3. Gray matter regions in which activation differs between PT and PO conditions ( $p < 0.05$  corrected for whole brain volume, cluster extent threshold  $> 250 \text{ mm}^3$ ).
